# Supplementary material for: Role of the central lysine cluster and scrapie templating in the transmissibility of synthetic prion protein aggregates
Source: PubMed Central journal article supplement (PMC5614645; doi:10.1371/journal.ppat.1006623), 2017-09-14
Supplement: ppat.1006623.s009.pdf [file ppat.1006623.s009.pdf]

S2 Table: Summary of histopathology results

|                                               | Animal # | DPI | Spongiosis                                              | Astrogliosis                                        | PrP deposition                                                                                                     |
|-----------------------------------------------|----------|-----|---------------------------------------------------------|-----------------------------------------------------|--------------------------------------------------------------------------------------------------------------------|
| ScBH(K <sub>4</sub> N) <sup>P1</sup> Hamsters | A457-2   | 496 | negative                                                | negative                                            | negative                                                                                                           |
|                                               | A457-1   | 496 | negative                                                | negative                                            | weak in the lateral ventricle along ependymal cells and around the parenchyma near the ventricle                   |
|                                               | A459-1   | 624 | weak, focal (CC and HC)                                 | weak around PrP deposits                            | weak, widespread diffuse, and subtle focal vacuolation in the CC                                                   |
|                                               | A459-2   | 652 | weak, focal (CC)                                        | negative                                            | weak to moderate, widespread deposition (CC and HC)                                                                |
| ScBH(WT) <sup>P1</sup> Hamsters               | A464-1   | 496 | negative                                                | negative                                            | negative                                                                                                           |
|                                               | A464-2   | 496 | negative                                                | negative                                            | negative                                                                                                           |
|                                               | A463-1   | 624 | negative                                                | negative                                            | negative                                                                                                           |
|                                               | A463-2   | 652 | negative                                                | negative                                            | negative                                                                                                           |
| ScBH(K <sub>4</sub> A) <sup>P1</sup> Hamsters | A519-1   | 467 | negative                                                | negative                                            | negative                                                                                                           |
|                                               | A519-2   | 467 | negative                                                | negative                                            | negative                                                                                                           |
|                                               | A531-1   | 561 | negative                                                | negative                                            | weak, diffuse deposition in the CC                                                                                 |
|                                               | A531-2   | 561 | negative                                                | negative                                            | weak, focal plaque-like deposits lining the meninges and ependymal cells                                           |
|                                               | A525-2   | 611 | negative                                                | negative                                            | negative                                                                                                           |
| ScBH(K <sub>4</sub> N) <sup>P1</sup> Mice     | B987-1   | 392 | moderate to severe, widespread (CC, SP, PO, and HC)     | severe around lesions                               | weak small punctate and granular aggregates (HT and ST) as well as diffuse punctate deposition (HC, CC and ST)     |
|                                               | B987-2   | 392 | moderate to severe, widespread (CC, SP, PO, and HC)     | severe around lesions                               | weak small punctate and granular aggregates (HT and ST) as well as diffuse punctate deposition (HC, CC and ST)     |
|                                               | B987-3   | 492 | moderate to severe, widespread                          | severe around lesions                               | weak small punctate and granular aggregates (HT and ST) as well as diffuse punctate deposition (HC, CC and ST)     |
|                                               | B988-2   | 492 | moderate to severe, widespread (CC, SP, PO, CB, and HC) | severe around lesions                               | weak small punctate and granular aggregates (HT and ST) as well as diffuse punctate deposition (HC, CC, CB and ST) |
| ScBH(WT) <sup>P1</sup> Mice                   | B993-1   | 104 | negative                                                | negative                                            | negative                                                                                                           |
|                                               | B994-1   | 392 | negative                                                | negative                                            | negative                                                                                                           |
|                                               | B994-2   | 392 | negative                                                | weak                                                | negative                                                                                                           |
|                                               | B991-1   | 492 | weak (TH)                                               | weak (TH)                                           | weak (TH, CC)                                                                                                      |
|                                               | B991-2   | 492 | negative                                                | weak                                                | negative                                                                                                           |
|                                               | B993-2   | 492 | negative                                                | weak                                                | negative                                                                                                           |
| ScBH(K <sub>4</sub> N) <sup>P2</sup> Mice     | C202-1   | 143 | weak (TH and CC)                                        | negative                                            | weak, widespread punctate deposition, especially in CC                                                             |
|                                               | C203-1   | 143 | weak (TH and CC)                                        | moderate (CC, HC and TH)                            | weak, widespread punctate deposition, especially in CC                                                             |
|                                               | C206-1   | 143 | weak (TH and CC)                                        | moderate (CC, HC and TH)                            | weak, widespread punctate deposition, especially in CC, SP, and ST                                                 |
|                                               | C206-2   | 143 | weak to moderate (TH, HC, and CC)                       | moderate (CC, HC and TH)                            | weak, widespread punctate deposition, especially in CC, SP, and ST                                                 |
|                                               | C207-3   | 143 | weak                                                    | moderate to severe (CC, SP, and TH)                 | weak, widespread punctate deposition, especially in CC, SP, and HC                                                 |
|                                               | C208-2   | 143 | weak to moderate (TH, HC, and SP)                       | moderate (HC, SP, and TH)                           | moderate, widespread punctate deposition, especially in FB, SP, and HC                                             |
|                                               | C209-1   | 143 | weak to moderate (TH and HC)                            | moderate to severe (HC and TH)                      | weak, widespread punctate PrP deposition, especially in CC and HC                                                  |
|                                               | C203-2   | 433 | severe, widespread and focal (HC)                       | moderate to severe, widespread and especially in HC | severe, widespread diffuse deposition especially in HC, CC, CL and FB                                              |
|                                               | C203-3   | 433 | severe, widespread and focal (HC)                       | moderate to severe, widespread and especially in HC | severe, widespread deposition especially in HC and CC                                                              |
|                                               | C209-3   | 433 | severe, widespread and focal (HC)                       | moderate to severe, widespread and especially in HC | severe, widespread deposition especially in HC and CC                                                              |
| ScBH(WT) <sup>P2</sup> Mice                   | C204-1   | 143 | weak                                                    | weak to moderate (CC, TH, and HC)                   | weak, widespread punctate deposition in many GM regions                                                            |
|                                               | C204-2   | 143 | weak                                                    | weak to moderate (CC, TH, and HC)                   | weak, widespread punctate deposition in many GM regions. Focal deposits in CB and MB                               |
|                                               | C205-1   | 245 | moderate to severe, widespread (TH, HT, CC)             | severe, around PrP deposits and vacuoles            | moderate, diffuse and small aggregates (BS, CB, TH, HT, PO, CC)                                                    |
|                                               | C205-2   | 251 | moderate to severe, widespread (TH, HC, HT, CC)         | severe, around PrP deposits and vacuoles            | severe, diffuse and small aggregates (BS, CB, TH, HT, HC, CC, PO, SP)                                              |
|                                               | C205-3   | 251 | moderate to severe, widespread (TH, HC, HT, CC)         | severe, around PrP deposits and vacuoles            | moderate to severe, diffuse and small aggregates (BS, CB, TH, HT, HC, CC)                                          |

CC: cerebral cortex; SP: septum; PO: preoptic area; HC: hippocampus; HT: hypothalamus; ST: striatum; TH: thalamus; CB: cerebellum; FB: forebrain; CL: colliculus; GM: gray matter; MB: midbrain; BS: brain stem
